# Supplementary material for: Evolutionary Genetics of Hypoxia Tolerance in Cetaceans during Diving
Source: PubMed Central journal article supplement — Genome Biol Evol. 2016 Feb 24;8(3):827–39. doi: 10.1093/gbe/evw037 (PMC4824146; doi:10.1093/gbe/evw037), 2016-02-24
Supplement: supp_evw037_supplementary_materials.pdf [file supp_evw037_supplementary_materials.pdf]

**Electronic Supplementary Information (ESM)**

**Evolutionary genetics of hypoxia tolerance in cetaceans during diving**

Ran Tian, Zhengfei Wang, Xu Niu, Kaiya Zhou, Shixia Xu<sup>\*</sup>, Guang Yang<sup>\*</sup>

Jiangsu Key Laboratory for Biodiversity and Biotechnology, College of Life Sciences, Nanjing

Normal University, Nanjing 210023, China

Table S1 The 17 candidate genes and their protein products

| <b>Gene</b> | <b>Ensembl ID</b> | <b>Protein Product</b> | <b>UniProtKB/Swiss-Prot Summary of Gene Function</b>                                            | <b>GeneCard Summary of Disorders / Diseases</b>                                                                     | <b>Sources of 3D Structure</b> | <b>Amino Acid Length</b> |
|-------------|-------------------|------------------------|-------------------------------------------------------------------------------------------------|---------------------------------------------------------------------------------------------------------------------|--------------------------------|--------------------------|
| HBA         | ENSG00000188536   | Hemoglobin alpha       | Involved in oxygen transport from the lung to the various peripheral tissues.                   | Alpha-thalassemia, beta-thalassemia, thalassemia, hemoglobinopathies, h disease                                     | PDB: 1SI4                      | 141                      |
| HBB         | ENSG00000244734   | Hemoglobin beta        | Involved in oxygen transport from the lung to the various peripheral tissues.                   | Beta-thalassemia, thalassemia, hemoglobinopathies, intermedia thalassemia, erythroleukemia                          | PDB: 1HHO                      | 146                      |
| MB          | ENSG00000198125   | Myoglobin              | Serves as a reserve supply of oxygen and facilitates the movement of oxygen within muscles.     | Rhabdomyolysis, acute myocardial infarction, rhabdomyolysis exertional acute, renal failure acute, rhabdomyosarcoma | PDB: 1U7S                      | 153                      |
| NGB         | ENSG00000165553   | Neuroglobin            | Involved in oxygen transport in the brain. Involved in neuroprotection during oxidative stress. | Ischemia, stroke                                                                                                    | -                              | 150                      |
| EDN1        | ENSG00000078401   | Endothelin-1           | Endothelins are endothelium-derived vasoconstrictor peptides.                                   | Hypertension pulmonary, vasospasm, hypertension arterial, atherosclerosis, essential hypertension                   | I-TASSER                       | 212                      |
| EDN2        | ENSG00000127129   | Endothelin-2           | Endothelins are endothelium-derived vasoconstrictor peptides                                    | Essential hypertension, carcinoma renal cell, cardiovascular diseases, hypertension pulmonary, vascular diseases    | I-TASSER                       | 178                      |
| EDN3        | ENSG00000124205   | Endothelin-3           | Endothelins are endothelium-derived vasoconstrictor peptides.                                   | Shah-waardenburg syndrome, hirschsprung disease, waardenburgs                                                       | I-TASSER                       | 238                      |

---

|        |                 |                                |                                                                                                                                                                            |                                                                                                                                      |          |     |
|--------|-----------------|--------------------------------|----------------------------------------------------------------------------------------------------------------------------------------------------------------------------|--------------------------------------------------------------------------------------------------------------------------------------|----------|-----|
|        |                 |                                |                                                                                                                                                                            | syndrome, colonic aganglionosis, central hypoventilation syndrome, congenital                                                        |          |     |
| EDNRA  | ENSG00000151617 | Endothelin receptor type A     | Receptor for endothelin-1. Mediates its action by association with G proteins that activate a phosphatidylinositol-calcium second messenger system.                        | Staphylococcal scalded skin syndrome, hypertension arterial, staphylococcal scarlet fever, hypertension pulmonary, bullous impetigo  | I-TASSER | 426 |
| EDNRB  | ENSG00000136160 | Endothelin receptor type B     | Non-specific receptor for endothelin 1, 2, and 3. Mediates its action by association with G proteins that activate a phosphatidylinositol-calcium second messenger system. | Hirschsprung disease, shah-waardenburg syndrome, waardenburgs syndrome, staphylococcal scalded skin syndrome, hirschsprung disease 2 | I-TASSER | 442 |
| AGTR1  | ENSG00000144891 | Angiotensin II receptor type 1 | Receptor for angiotensin II. Mediates its action by association with G proteins that activate a phosphatidylinositol-calcium second messenger system                       | Essential hypertension, diabetic nephropathies, renal disease, cardiovascular diseases, heart failure                                | -        | 358 |
| AGTR2  | ENSG00000179772 | Angiotensin II receptor type 2 | Receptor for angiotensin II. Cooperates with MTUS1 to inhibit ERK2 activation and cell proliferation.                                                                      | Diabetic nephropathies, cardiac hypertrophy, ventricular hypertrophy, renal disease, hypertrophy                                     | -        | 120 |
| ADRA1A | ENSG00000120907 | Adrenergic receptor alpha-1 A  | This alpha-adrenergic receptor mediates its action by association with G proteins that activate a phosphatidylinositol-calcium second messenger system. Nuclear            | Benign prostatic hyperplasia, attention-deficit hyperactivity, disorder                                                              | -        | 466 |

---

---

|        |                 |                                   |                                                                                                                                                                                                                                                                                                                                                                                 |                                                                                                     |          |     |
|--------|-----------------|-----------------------------------|---------------------------------------------------------------------------------------------------------------------------------------------------------------------------------------------------------------------------------------------------------------------------------------------------------------------------------------------------------------------------------|-----------------------------------------------------------------------------------------------------|----------|-----|
| ADRA1B | ENSG00000170214 | Adrenergic receptor alpha-1 B     | ADRA1A-ADRA1B heterooligomers regulate phenylephrine (PE)-stimulated ERK signaling in cardiac myocytes. This alpha-adrenergic receptor mediates its action by association with G proteins that activate a phosphatidylinositol-calcium second messenger system. Nuclear ADRA1A-ADRA1B heterooligomers regulate phenylephrine (PE)-stimulated ERK signaling in cardiac myocytes. | Hyperfunction, cardiomyopathy, heart failure                                                        | -        | 520 |
| ADRA1D | ENSG00000171873 | Adrenergic receptor alpha-1 D     | This alpha-adrenergic receptor mediates its effect through the influx of extracellular calcium.                                                                                                                                                                                                                                                                                 | Benign prostatic hyperplasia, essential hypertension, obstruction                                   | I-TASSER | 572 |
| AVP    | ENSG00000101200 | Arginine vasopressin              | Vasopressin has a direct antidiuretic action on the kidney, it also causes vasoconstriction of the peripheral vessels.                                                                                                                                                                                                                                                          | Central diabetes insipidus, hyponatremia, siadh, diabetes insipidus nephrogenic, carcinoma oat cell | I-TASSER |     |
| AVPR1A | ENSG00000166148 | Arginine vasopressin receptor 1 A | Receptor for arginine vasopressin. The activity of this receptor is mediated by G proteins which activate a phosphatidyl-inositol-calcium second messenger system.                                                                                                                                                                                                              | Adrenal hyperplasia, dysmenorrhea, tumors, ischemia, cancer lung                                    | -        | 418 |
| AVPR1B | ENSG00000198049 | Arginine vasopressin receptor 1 B | Receptor for arginine vasopressin. The activity of this receptor is mediated by G proteins which activate a                                                                                                                                                                                                                                                                     | Cushing syndrome, carcinoid, major depression, adenoma, tumors                                      | -        | 424 |

---

---

phosphatidyl-inositol-calcium second  
messenger system

---

Note: The Protein Data Bank (PDB) is a database containing experimentally determined three-dimensional structures of proteins, nucleic acids and other biological macromolecules, with approximately 8000 entries (<http://www.rcsb.org/pdb/>). I-TASSER is a state-of-the-art hierarchical protein structure modeling approach that is based on the secondary-structure enhanced profile-profile threading alignment (Zhang 2008). The “-” indicated 3D structure did not be used in this study.

Tables S2 Statistics for amplified exons of 11 genes for each species.

Note: tick represents successfully amplified, while no sign in any genes indicate no amplification despite numerous attempts.

| Species                           | HBA   |       |       |
|-----------------------------------|-------|-------|-------|
|                                   | Exon1 | Exon2 | Exon3 |
| <i>Tursiops truncatus</i>         | ✓     | ✓     | ✓     |
| <i>Delphinus capensis</i>         | ✓     | ✓     | ✓     |
| <i>Sousa chinensis</i>            | ✓     | ✓     | ✓     |
| <i>Neophocaena phocaenoides</i>   | ✓     | ✓     | ✓     |
| <i>Delphinapterus leucas</i>      |       |       |       |
| <i>Lipotes vexillifer</i>         | ✓     | ✓     | ✓     |
| <i>Mesoplodon densirostris</i>    | ✓     | ✓     | ✓     |
| <i>Kogia sima</i>                 | ✓     | ✓     | ✓     |
| <i>Physeter macrocephalus</i>     | ✓     | ✓     | ✓     |
| <i>Balaenoptera acutorostrata</i> | ✓     | ✓     | ✓     |
| <i>Banaenoptera omurai</i>        |       |       |       |

| Species                           | HBB   |       |       |
|-----------------------------------|-------|-------|-------|
|                                   | Exon1 | Exon2 | Exon3 |
| <i>Tursiops truncatus</i>         | ✓     | ✓     | ✓     |
| <i>Delphinus capensis</i>         | ✓     | ✓     | ✓     |
| <i>Sousa chinensis</i>            | ✓     | ✓     | ✓     |
| <i>Neophocaena phocaenoides</i>   | ✓     | ✓     | ✓     |
| <i>Delphinapterus leucas</i>      | ✓     | ✓     | ✓     |
| <i>Lipotes vexillifer</i>         | ✓     | ✓     | ✓     |
| <i>Mesoplodon densirostris</i>    | ✓     | ✓     | ✓     |
| <i>Kogia sima</i>                 | ✓     | ✓     | ✓     |
| <i>Physeter macrocephalus</i>     | ✓     | ✓     | ✓     |
| <i>Balaenoptera acutorostrata</i> | ✓     | ✓     | ✓     |
| <i>Banaenoptera omurai</i>        | ✓     | ✓     | ✓     |

| Species                           | MB    |       |       |
|-----------------------------------|-------|-------|-------|
|                                   | Exon1 | Exon2 | Exon3 |
| <i>Tursiops truncatus</i>         | ✓     | ✓     | ✓     |
| <i>Delphinus capensis</i>         | ✓     | ✓     | ✓     |
| <i>Sousa chinensis</i>            | ✓     | ✓     | ✓     |
| <i>Neophocaena phocaenoides</i>   | ✓     | ✓     | ✓     |
| <i>Delphinapterus leucas</i>      | ✓     | ✓     | ✓     |
| <i>Lipotes vexillifer</i>         | ✓     | ✓     | ✓     |
| <i>Mesoplodon densirostris</i>    | ✓     | ✓     |       |
| <i>Kogia sima</i>                 | ✓     | ✓     | ✓     |
| <i>Physeter macrocephalus</i>     | ✓     | ✓     |       |
| <i>Balaenoptera acutorostrata</i> | ✓     | ✓     | ✓     |
| <i>Banaenoptera omurai</i>        | ✓     | ✓     | ✓     |

| Species                           | NGB   |       |       |       |
|-----------------------------------|-------|-------|-------|-------|
|                                   | Exon1 | Exon2 | Exon3 | Exon4 |
| <i>Tursiops truncatus</i>         |       | ✓     | ✓     | ✓     |
| <i>Delphinus capensis</i>         |       | ✓     | ✓     | ✓     |
| <i>Sousa chinensis</i>            |       | ✓     | ✓     | ✓     |
| <i>Neophocaena phocaenoides</i>   |       | ✓     | ✓     | ✓     |
| <i>Delphinapterus leucas</i>      |       | ✓     | ✓     | ✓     |
| <i>Lipotes vexillifer</i>         |       | ✓     | ✓     | ✓     |
| <i>Mesoplodon densirostris</i>    |       | ✓     | ✓     | ✓     |
| <i>Kogia sima</i>                 |       | ✓     | ✓     | ✓     |
| <i>Physeter macrocephalus</i>     |       | ✓     | ✓     | ✓     |
| <i>Balaenoptera acutorostrata</i> |       | ✓     | ✓     | ✓     |
| <i>Balaenoptera omurai</i>        |       | ✓     | ✓     | ✓     |

| Species                           | EDN1  |       |       |       |       |
|-----------------------------------|-------|-------|-------|-------|-------|
|                                   | Exon1 | Exon2 | Exon3 | Exon4 | Exon5 |
| <i>Tursiops truncatus</i>         | ✓     | ✓     | ✓     | ✓     | ✓     |
| <i>Delphinus capensis</i>         | ✓     | ✓     | ✓     | ✓     | ✓     |
| <i>Sousa chinensis</i>            | ✓     | ✓     | ✓     | ✓     | ✓     |
| <i>Neophocaena phocaenoides</i>   | ✓     | ✓     | ✓     | ✓     | ✓     |
| <i>Delphinapterus leucas</i>      | ✓     | ✓     | ✓     | ✓     | ✓     |
| <i>Lipotes vexillifer</i>         | ✓     | ✓     | ✓     | ✓     | ✓     |
| <i>Mesoplodon densirostris</i>    | ✓     | ✓     | ✓     | ✓     | ✓     |
| <i>Kogia sima</i>                 | ✓     | ✓     | ✓     | ✓     | ✓     |
| <i>Physeter macrocephalus</i>     | ✓     | ✓     | ✓     | ✓     | ✓     |
| <i>Balaenoptera acutorostrata</i> | ✓     | ✓     |       |       | ✓     |
| <i>Balaenoptera omurai</i>        | ✓     | ✓     | ✓     | ✓     | ✓     |

| Species                           | EDN2  |       |       |       |       |
|-----------------------------------|-------|-------|-------|-------|-------|
|                                   | Exon1 | Exon2 | Exon3 | Exon4 | Exon5 |
| <i>Tursiops truncatus</i>         | ✓     | ✓     | ✓     | ✓     | ✓     |
| <i>Delphinus capensis</i>         | ✓     | ✓     | ✓     | ✓     | ✓     |
| <i>Sousa chinensis</i>            | ✓     | ✓     | ✓     | ✓     | ✓     |
| <i>Neophocaena phocaenoides</i>   | ✓     | ✓     | ✓     | ✓     | ✓     |
| <i>Delphinapterus leucas</i>      | ✓     | ✓     | ✓     | ✓     | ✓     |
| <i>Lipotes vexillifer</i>         | ✓     | ✓     | ✓     | ✓     | ✓     |
| <i>Mesoplodon densirostris</i>    | ✓     | ✓     | ✓     | ✓     | ✓     |
| <i>Kogia sima</i>                 | ✓     | ✓     | ✓     | ✓     | ✓     |
| <i>Physeter macrocephalus</i>     | ✓     | ✓     | ✓     | ✓     | ✓     |
| <i>Balaenoptera acutorostrata</i> | ✓     | ✓     | ✓     | ✓     | ✓     |
| <i>Balaenoptera omurai</i>        | ✓     | ✓     | ✓     | ✓     | ✓     |





| Species                           | AGTR1 |
|-----------------------------------|-------|
|                                   | Exon1 |
| <i>Tursiops truncatus</i>         | ✓     |
| <i>Delphinus capensis</i>         | ✓     |
| <i>Sousa chinensis</i>            | ✓     |
| <i>Neophocaena phocaenoides</i>   | ✓     |
| <i>Delphinapterus leucas</i>      | ✓     |
| <i>Lipotes vexillifer</i>         | ✓     |
| <i>Mesoplodon densirostris</i>    | ✓     |
| <i>Kogia sima</i>                 | ✓     |
| <i>Physeter macrocephalus</i>     | ✓     |
| <i>Balaenoptera acutorostrata</i> | ✓     |
| <i>Balaenoptera omurai</i>        | ✓     |

| Species                           | AGTR2               |
|-----------------------------------|---------------------|
|                                   | Exon1               |
| <i>Tursiops truncatus</i>         | ✓ Partial sequences |
| <i>Delphinus capensis</i>         | ✓ Partial sequences |
| <i>Sousa chinensis</i>            | ✓ Partial sequences |
| <i>Neophocaena phocaenoides</i>   | ✓ Partial sequences |
| <i>Delphinapterus leucas</i>      | ✓ Partial sequences |
| <i>Lipotes vexillifer</i>         | ✓ Partial sequences |
| <i>Mesoplodon densirostris</i>    | ✓ Partial sequences |
| <i>Kogia sima</i>                 | ✓ Partial sequences |
| <i>Physeter macrocephalus</i>     | ✓ Partial sequences |
| <i>Balaenoptera acutorostrata</i> | ✓ Partial sequences |
| <i>Balaenoptera omurai</i>        | ✓ Partial sequences |

Table S3 List of primers used to amplify the coding regions of hypoxia-tolerance-related genes in this study.

| Gene | Sense Primer           | Antisense Primer        | Melting Temp (°C) | Product Size (bp) |
|------|------------------------|-------------------------|-------------------|-------------------|
| HBA  | GGACCAGGATAGCACTTC     | GGACCAGGATAGCACTTC      | 50-55             | 1384              |
| HBB  | GAAGGGAAGTGAAGGAACA    | GTGAGCAAACAGGGTAAA      | 50-55             | 820               |
|      | GGACCAGACAATCACAGA     | AGACAACCAGCAGCCTAA      | 50-55             | 451               |
|      | YAGCKRCTGCTTACACTTGC   | CTCTTCCATTCTAAACTGC     | 50-55             | 610               |
|      | TGCTTCTTGAAATGGTCCTA   | GAATATGGTCTTCCGATGGT    | 50-55             | 412               |
| MB   | GCCTTGCTCTTCTTCTCT     | CTGACTCCAATCTCTGACA     | 50-55             | 302               |
|      | CTTGCTCTTCTTCTTCTTCTC  | TCCTGACTCCAATCTCTGA     | 50-55             | 302               |
|      | GCTCTTCTTCTTCTTCTCAG   | GCTCTAGGCATACAGGATT     | 50-55             | 375               |
|      | CATTTAATCCTCACGCTTCT   | CACTTCCTCCTTGGTAACA     | 50-55             | 648               |
|      | TGCCTGGTAGATAGTAAGTG   | TAGGTGAAAGGAGAGTTGAG    | 50-55             | 557               |
| NGB  | CTTCCTGTCCCAGTCCA      | GAGTCGCCAGCCTCTAA       | 50-55             | 731               |
|      | TCCTATGCCAGGTCGTATGAG  | GCTCAAAGCCCTAAACACAC    | 50-55             | 752               |
|      | GGTTCTGGATTATGGTCGTG   | AGGCTGTTCTGGGATGG       | 50-55             | 496               |
|      | TCTCTTCCTTCTGGTTGG     | GGCTCCTTCACTTCTTAT      | 50-55             | 459               |
|      | CTCAGGTTTCATCTCAGGTT   | GGCTACAATGGACACAGA      | 50-55             | 586               |
| EDN1 | TTCGGGTTTAGTTCGCAGTG   | ATTCCCTTGACATCCTTTCT    | 50-55             | 866               |
|      | CCAAATGTCTAACAGGCAGTAT | TCTAGGTCTCGCTCTACCATAA  | 50-55             | 915               |
|      | CCAAATGTCTAACAGGCAGTAT | AGCCACGTATGACCTCAGCAAC  | 50-55             | 755               |
|      | CGAAACAGATACCAAAGC     | CTCCCATCAAGGCAAGA       | 50-55             | 801               |
|      | TCACTTGAGGTTAGCAGGGTA  | TGGAGGCAAATGAAGACG      | 50-55             | 483               |
| EDN2 | AGGGCACCGAGGCAATG      | GCAGTGCTTGGCGTAGGGA     | 50-55             | 1110              |
|      | GGTGGGACTTCTTGAGGTGAG  | GGGCAGTGAGATGGGTTGG     | 50-55             | 484               |
|      | CGGTCTGGTTTATCTAATCCTC | TTTCTACTTTCCCAAATGCTCC  | 50-55             | 777               |
|      | GGAGCATTTGGGAAAGTAGAA  | TCTGGTGGTAACAAAGAGCATAG | 50-55             | 654               |

|       |                      |                       |       |      |
|-------|----------------------|-----------------------|-------|------|
|       | GCACAGGGTGGAATGGA    | CCTGGGCAAACACCTCA     | 50-55 | 315  |
|       | TTGGGTGACGGAAGGTA    | ACGCCGTTTCCTTCAGC     | 50-55 | 713  |
|       | TTGGGTGACGGAAGGTA    | ACCCATCCAGCCTCTACGG   | 50-55 | 833  |
| EDN3  | CAGCGGGCACAGATA      | CCCACAGGAGGTAAGGA     | 50-55 | 1075 |
|       | CCACAGTTGGGTCTTGA    | CACATCGGGTGGAACA      | 50-55 | 680  |
|       | TTCGAGTGGGACATGC     | CATACGGCAGCGACT       | 50-55 | 751  |
|       | AGGTGACATTGGCATAAAG  | TGAACCCAGCAGAAGC      | 50-55 | 857  |
| EDNRA | ACTGCCATGTCCATAT     | CTCCCACTCAGGCTCTAA    | 50-55 | 1491 |
|       | CTACTCAAAGGAAAACTGCC | TCTTACCCTGGAAATGGA    | 50-55 | 1139 |
|       | GTCTCTTGCTACCACACTAA | TTCGTTGCCGTAAGGATG    | 50-55 | 526  |
|       | TAAGCCGTCATCCAAACC   | GTTGCCTGAACCAAAGAT    | 50-55 | 644  |
|       | AACTCCAAATGGGTAGAA   | ATAAGCATCAGCGTGTCT    | 50-55 | 753  |
|       | CACCTCCAAGCCATTAC    | CTGGCACAGTTCCAACCC    | 50-55 | 745  |
|       | TTGAAGAGGTGGAGGCAT   | GAGAATGTAGAGTAGGTGGTT | 50-55 | 379  |
|       | GCTGACATAGCCCACAAC   | CCTGCACCCTTGA         | 50-55 | 1287 |
|       | TTCTGACTGCCACCTATAAG | CCTCTGAATATGTTGTTGCTG | 50-55 | 444  |
|       | TTACAAACTCCCTACCCT   | AAACCAGTCAACCCTTCA    | 50-55 | 517  |
|       | CCAGCCCTTCCACTCAT    | CCGCCAACTCCCACCATT    | 50-55 | 767  |
|       | GTTCTGCCTCTTATTATCC  | GGTGACCAGTTCTTACGG    | 50-55 | 1256 |
| EDNRB | CATCCTTTCCTCCCTGTC   | GGTTCCAATGATTACTGACTT | 50-55 | 952  |
|       | TCTCCCTCTGGGCACAAC   | GGTTCCAATGATTACTGACTT | 50-55 | 998  |
|       | CCACTTCCTTGTTCCAGA   | CAGAGCCCAGTTTTATTG    | 50-55 | 401  |
|       | CCACTTCCTTGTTCCAGA   | GGCAGAGCCCAGTTTTAT    | 50-55 | 403  |
|       | GCCCTTTGGAGTTGAGAT   | TCTGTATTCTGAGCACC     | 50-55 | 660  |
|       | AGGCGATGACAGGGACAG   | TGTTGAGGCAGTAGGGA     | 50-55 | 885  |
|       | AATAAACTGGGCTCTGC    | GGGCGACTTCTACTTGAT    | 50-55 | 635  |

---

|       |                      |                    |       |      |
|-------|----------------------|--------------------|-------|------|
|       | TGAGGCGATGACAGGGAC   | CCGCTCACCGCAACTATA | 50-55 | 547  |
|       | TAACTTGCCTATGTGAAGAC | CTACTCGCTCATTTGGAC | 50-55 | 1242 |
|       | GCTTCGTGTCTCCTCAAC   | TGCTGTGCTGCTTCATAC | 50-55 | 804  |
| AGTR1 | GCTGTCTACACTGCTAT    | ATCTCCTGTTGCTCCTCT | 50-55 | 1217 |
|       | CCCCACGTCTACTTGTCT   | AGCCTTCTTTAGGGTCTT | 50-55 | 962  |
| AGTR2 | TTACCAGCAGTCTTCACG   | CAAGTAATCGGAACCCTA | 50-55 | 973  |

---

Table S5 Previously reported maximum dive durations for cetaceans

| <b>Cetacean species</b>           | <b>Family</b>   | <b>Max. dive time<br/>(min)</b> | <b>References</b>            |
|-----------------------------------|-----------------|---------------------------------|------------------------------|
| <b>Odontocetes</b>                |                 |                                 |                              |
| <i>Delphinus delphis</i>          | Delphinidae     | 5                               | Evans 1971                   |
| <i>Tursiops truncatus</i>         | Delphinidae     | 8                               | Ridgway and Harrison<br>1986 |
| <i>Delphinus capensis</i>         | Delphinidae     | 5                               | Evans 1971                   |
| <i>Sousa chinensis</i>            | Delphinidae     | 5                               | Parra et al. 2004            |
| <i>Orcinus orca</i>               | Delphinidae     | 10.4                            | Baird et al. 2005            |
| <i>Neophocaena phocaenoides</i>   | Phocoenidae     | 2.48                            | Akamatsu et al. 2002         |
| <i>Delphinapterus leucas</i>      | Delphinidae     | 18.3                            | Martin et al. 1993           |
| <i>Lipotes vexillifer</i>         | Lipotidae       | 2                               | Parra et al. 2004            |
| <i>Mesoplodon densirostris</i>    | Ziphiidae       | 57.4                            | Tyack et al. 2006            |
| <i>Physeter macrocephalus</i>     | Physeteridae    | 73                              | Watkins et al. 1993          |
| <i>Kogia sima</i>                 | Kogiidae        | 43                              | Breese and Tershy 1993       |
| <b>Mysticetes</b>                 |                 |                                 |                              |
| <i>Balaenoptera acutorostrata</i> | Balaenopteridae | 13.4                            | Croll et al. 2001            |

Table S6 One-ratio model analysis in 17 genes

| <b>Genes</b> | <b>Models</b>   | <b>-lnL</b> | <b>2 ΔLnL</b> | <b>P value</b> | <b>ω values</b> |
|--------------|-----------------|-------------|---------------|----------------|-----------------|
| HBA          | M0(one-ratio)   | 3088.622    |               |                | ω= 0.200        |
|              | M0(constrained) | 3224.482    | 271.72        | <0.001         | ω= 1            |
| HBB          | M0(one-ratio)   | 3528.038    |               |                | ω= 0.283        |
|              | M0(constrained) | 3627.432    | 198.788       | <0.001         | ω= 1            |
| MB           | M0(one-ratio)   | 3945.824    |               |                | ω= 0.097        |
|              | M0(constrained) | 4331.292    | 770.936       | <0.001         | ω= 1            |
| NGB          | M0(one-ratio)   | 1987.589    |               |                | ω= 0.073        |
|              | M0(constrained) | 2220.366    | 465.554       | <0.001         | ω= 1            |
| AGTR1        | M0(one-ratio)   | 5917.725    |               |                | ω= 0.081        |
|              | M0(constrained) | 6514.433    | 1193.416      | <0.001         | ω= 1            |
| AGTR2        | M0(one-ratio)   | 3569.236    |               |                | ω= 0.080        |
|              | M0(constrained) | 3869.325    | 600.178       | <0.001         | ω= 1            |
| EDN1         | M0(one-ratio)   | 6094.134    |               |                | ω= 0.337        |
|              | M0(constrained) | 6227.731    | 267.194       | <0.001         | ω= 1            |
| EDN2         | M0(one-ratio)   | 3507.497    |               |                | ω= 0.386        |
|              | M0(constrained) | 3563.845    | 112.696       | <0.001         | ω= 1            |
| EDN3         | M0(one-ratio)   | 6548.742    |               |                | ω= 0.460        |
|              | M0(constrained) | 6624.958    | 152.432       | <0.001         | ω= 1            |
| EDNRA        | M0(one-ratio)   | 6112.603    |               |                | ω= 0.089        |
|              | M0(constrained) | 6633.350    | 1041.494      | <0.001         | ω= 1            |
| EDNRB        | M0(one-ratio)   | 7887.625    |               |                | ω= 0.214        |
|              | M0(constrained) | 8229.283    | 683.316       | <0.001         | ω= 1            |
| ADRA1A       | M0(one-ratio)   | 7962.800    |               |                | ω= 0.053        |
|              | M0(constrained) | 9146.433    | 2367.266      | <0.001         | ω= 1            |
| ADRA1B       | M0(one-ratio)   | 7389.238    |               |                | ω= 0.044        |
|              | M0(constrained) | 8504.499    | 2230.522      | <0.001         | ω= 1            |
| ADRA1D       | M0(one-ratio)   | 10490.310   |               |                | ω= 0.075        |
|              | M0(constrained) | 11694.867   | 2409.114      | <0.001         | ω= 1            |
| AVP          | M0(one-ratio)   | 3365.857    |               |                | ω= 0.092        |
|              | M0(constrained) | 3688.287    | 644.860       | <0.001         | ω= 1            |
| AVPR1A       | M0(one-ratio)   | 8878.038    |               |                | ω= 0.128        |
|              | M0(constrained) | 9567.991    | 1379.906      | <0.001         | ω= 1            |
| AVPR1B       | M0(one-ratio)   | 9980.951    |               |                | ω= 0.166        |
|              | M0(constrained) | 10601.350   | 1240.798      | <0.001         | ω= 1            |

Table S7 Selective pressure analyses in cetaceans-only dataset using site model in PAML.

| <b>Genes</b> | <b>Site Model</b> | <b>-ln <i>L</i></b> | <b>2 Δ(ln <i>L</i>)</b> | <b><i>P</i> value</b> | <b>ω values</b> |
|--------------|-------------------|---------------------|-------------------------|-----------------------|-----------------|
| HBA          | M8a               | 976.937             |                         |                       | ω= 1            |
|              | M8                | 973.857             | 6.16                    | 0.013                 | ω= 2.459        |
| HBB          | M8a               | 995.882             |                         |                       | ω= 1            |
|              | M8                | 991.361             | 9.042                   | 0.003                 | ω= 4.860        |
| MB           | M8a               | 1194.849            |                         |                       |                 |
|              | M8                | 1192.871            | 3.956                   | 0.047                 | ω= 1.796        |
| EDN2         | M8a               | 1201.265            |                         |                       | ω= 1            |
|              | M8                | 1197.744            | 7.042                   | 0.008                 | ω= 14.891       |
| ADRA1D       | M8a               | 2767.301            |                         |                       | ω= 1            |
|              | M8                | 2762.365            | 9.872                   | 0.002                 | ω= 26.247       |

Table S8 All Amino acid sites under positive selection identified by PAML, DATAMONKET and TreeSAAP

| Gene | Site<br>Position | PAML                            |                                   | Datamonkey                    |                             |                                | TreeSAAP properties |                     |                    |                                                  |                      |   |
|------|------------------|---------------------------------|-----------------------------------|-------------------------------|-----------------------------|--------------------------------|---------------------|---------------------|--------------------|--------------------------------------------------|----------------------|---|
|      |                  | Site Model<br>(M8) <sup>a</sup> | Branch-Site<br>Model <sup>a</sup> | FEL<br>$p < 0.2$ <sup>b</sup> | REL<br>BF > 50 <sup>b</sup> | FUBAR<br>pp > 0.8 <sup>b</sup> | AA<br>Changes       | Parallel<br>Changes | Clade <sup>c</sup> | Radical Changes<br>in AA Properties <sup>d</sup> | Total                |   |
| HBA  | 16               | 0.912                           |                                   | 0.106                         | 450.038                     | 0.820                          | G-A                 |                     | a                  | $P_a, P_c, P$                                    | 3                    |   |
|      |                  |                                 |                                   |                               |                             |                                | A-S                 |                     | h                  | $P_a, P_c, P$                                    | 3                    |   |
|      |                  |                                 |                                   |                               |                             |                                | A-G                 |                     | c1                 | $P_a, P_c, P$                                    | 3                    |   |
|      | 18               | 0.897                           |                                   | 0.134                         | 406                         | 0.805                          | V-I                 |                     | a                  | $pK'$                                            | 1                    |   |
|      |                  |                                 |                                   |                               |                             |                                | I-V                 | Yes                 | b1, n              | $pK'$                                            | 1                    |   |
|      | 20               | 0.989                           |                                   |                               |                             | 149.32                         | 0.901               | G-S                 |                    | a                                                |                      |   |
|      |                  |                                 |                                   |                               |                             |                                |                     | S-N                 | Yes                | d, m1                                            |                      |   |
|      |                  |                                 |                                   |                               |                             |                                |                     | N-S                 |                    | v                                                |                      |   |
|      |                  |                                 |                                   |                               |                             |                                |                     | S-G                 | Yes                | c1, i1                                           |                      |   |
|      | 22               | 0.981                           |                                   |                               | 0.084                       | 475.336                        | 0.836               | A-G                 | Yes                | d, m1                                            | $P_a, P_c, P$        | 3 |
|      |                  |                                 |                                   |                               |                             |                                |                     | G-S                 |                    | e                                                |                      |   |
|      | 25               | 0.920                           |                                   |                               | 0.116                       | 416.941                        | 0.839               | Y-F                 | Yes                | n, b1                                            | $F$                  | 1 |
|      | 52               | 0.843                           |                                   |                               |                             | 176.704                        | 0.859               | G-N                 |                    | N                                                |                      |   |
|      |                  |                                 |                                   |                               |                             |                                |                     | G-D                 |                    | m1                                               | $\alpha_c, P_r, E_t$ | 3 |
|      |                  |                                 |                                   |                               |                             |                                |                     | L-M                 |                    | a                                                |                      |   |
| 74   | 0.802            |                                 |                                   |                               | 134.561                     |                                | M-I                 |                     | d                  | $pK'$                                            | 1                    |   |
|      |                  |                                 |                                   |                               |                             |                                | M-L                 |                     | n                  |                                                  |                      |   |
|      |                  |                                 |                                   |                               |                             |                                |                     |                     |                    |                                                  |                      |   |



|     |     |       |       |       |         |       |     |     |       |                            |   |
|-----|-----|-------|-------|-------|---------|-------|-----|-----|-------|----------------------------|---|
|     | 76  | 0.864 |       |       | 146.049 |       | D-N |     | a     | $\alpha_c$                 | 1 |
|     |     |       |       |       |         |       | N-T | Yes | n, cl |                            |   |
|     |     |       |       |       |         |       | T-A |     | il    | $P_\alpha$                 | 1 |
|     | 112 | 0.886 |       |       | 178.977 |       | A-V |     | a     | $P_\beta$                  | 1 |
|     |     |       |       |       |         |       | V-L | Yes | d, ml |                            |   |
|     |     |       |       |       |         |       | V-A |     | n     | $P_\beta$                  | 1 |
| HBB | 3   |       | 0.938 |       |         |       | H-Q |     | fl    |                            |   |
|     | 11  |       | 0.928 |       |         |       | A-G |     | fl    | $P_\alpha, P_c, P$         | 3 |
|     | 12  |       | 0.995 |       |         |       | V-L |     | fl    |                            |   |
|     | 45  | 0.953 |       | 0.092 | 442.775 | 0.963 | S-A | Yes | q, cl | $P_\alpha, P_c, P$         | 3 |
|     |     |       |       |       |         |       | S-H |     | n     | $F$                        | 1 |
|     | 51  |       | 0.943 |       |         |       | T-S |     | fl    |                            |   |
|     | 60  | 0.917 |       |       | 56.360  |       | K-N |     | b     | $pH_i$                     | 1 |
|     |     |       | 0.988 |       |         |       | N-S |     | il    |                            |   |
|     |     |       | 0.960 |       |         |       | N-K |     | fl    | $pH_i$                     | 1 |
|     | 62  |       | 0.997 |       |         |       | K-Q |     | fl    | $pH_i$                     | 1 |
|     | 63  | 0.994 |       | 0.200 | 384.186 | 0.958 | A-S |     | il    | $P_\alpha, P_c, P$         | 3 |
|     |     |       | 1.000 |       |         |       | A-K |     | c     | $K^o, B_r, E_{sm}, E_t, h$ | 5 |
|     | 73  | 0.943 | 0.936 |       | 179.09  | 0.927 | S-G | Yes | e, fl |                            |   |
|     |     |       |       |       |         |       | G-S |     | al    |                            |   |

|      |     |       |       |       |         |       |     |     |           |                                                                 |    |
|------|-----|-------|-------|-------|---------|-------|-----|-----|-----------|-----------------------------------------------------------------|----|
|      | 88  | 0.891 | 0.933 | 0.169 | 308.649 | 0.926 | T-Q |     | il        |                                                                 |    |
|      |     |       |       |       |         |       | T-A |     | c         | $P_\alpha$                                                      | 1  |
|      | 134 |       | 0.971 |       |         |       | V-L |     | il        |                                                                 |    |
| MB   | 6   | 0.861 |       | 0.140 |         |       | G-A | Yes | l, q      | $P_\alpha, P_c, P$                                              | 3  |
|      | 36  | 0.921 |       | 0.102 |         | 0.896 | G-S |     | n         |                                                                 |    |
|      |     |       |       |       |         |       | S-H |     | p         | $F$                                                             | 1  |
|      | 52  | 0.872 |       | 0.141 |         |       | T-S | Yes | l, p      |                                                                 |    |
|      | 75  |       |       | 0.159 |         | 0.875 | G-A | Yes | d, n      | $P_\alpha, P_c, P$                                              | 3  |
|      |     |       |       |       |         |       | A-G |     | k         | $P_\alpha, P_c, P$                                              | 3  |
|      | 130 | 0.856 |       | 0.151 |         |       | G-A | Yes | r, el     | $P_\alpha, P_c, P$                                              | 3  |
| EDN1 | 125 |       |       | 0.199 |         | 0.850 | Q-E |     | i         |                                                                 |    |
| EDN2 | 12  |       |       | 0.039 | 761.565 | 0.965 | V-A |     | c         | $P_\beta$                                                       | 1  |
|      |     |       |       |       |         |       | V-I |     | il        | $pK'$                                                           | 1  |
|      | 114 | 0.942 |       | 0.023 | 190.831 | 0.984 | R-Q | Yes | z, cl     | $pH_i$                                                          | 1  |
|      |     |       |       |       |         |       | R-L |     | ll        | $N_s, \alpha_n, pH_i, B_r, R_F,$<br>$h, H_{nc}, p, E_{sm}, E_t$ | 10 |
|      | 162 | 0.937 |       | 0.057 | 70.988  | 0.977 | Q-R | Yes | f, cl, ml | $pH_i$                                                          | 1  |
| EDN3 | 34  |       |       | 0.144 |         | 0.838 | T-A |     | fl        | $P_\alpha$                                                      | 1  |
|      |     |       |       |       |         |       | T-R |     | m1        | $pH_i, H_{nc}, E_{sm},$                                         | 3  |
|      | 152 |       |       | 0.155 |         | 0.843 | E-Q |     | a         |                                                                 | 0  |

|        |     |       |       |         |       |     |       |                                                                 |                                     |   |
|--------|-----|-------|-------|---------|-------|-----|-------|-----------------------------------------------------------------|-------------------------------------|---|
|        |     |       |       |         | Q-L   |     | z     | $N_s, B_r, h, F, p, E_t$                                        | 6                                   |   |
|        |     |       |       |         | Q-R   |     | m1    | $pH_i$                                                          | 1                                   |   |
|        | 167 |       | 0.169 | 0.842   | R-G   |     | d     | $C_a, pH_i, M_v, M_w,$<br>$H_{nc}, V^0, u, E_{sm}, E_t$         | 9                                   |   |
| EDNRA  | 19  |       | 0.196 | 63.872  | 0.912 | I-V | f     | $Pk'$                                                           | 1                                   |   |
|        |     |       |       |         | I-F   |     | m1    |                                                                 |                                     |   |
|        | 22  |       | 0.173 | 73.036  | 0.916 | N-D | fl    | $\alpha_c$                                                      | 1                                   |   |
|        |     |       |       |         | N-S   |     | il    |                                                                 |                                     |   |
|        | 161 |       |       | 54.314  | 0.878 | F-L | Yes   | z, b1                                                           |                                     |   |
| EDNRB  | 80  |       |       | 10721.8 | 0.888 | T-I | Yes   | f, b1                                                           | $N_s, B_r, Pk', R_a, H_p,$<br>$H_t$ | 6 |
|        |     |       |       |         | T-A   |     | fl    | $P_a$                                                           | 1                                   |   |
|        | 347 |       | 0.195 | 11076.6 |       | L-R | f     | $N_s, B_r, R_F, h, pH_i,$<br>$H_{nc}, p, \alpha_n, E_{sm}, E_t$ | 10                                  |   |
|        |     |       |       |         | R-H   |     | w     | $E_{sm}$                                                        | 1                                   |   |
| ADRA1D | 454 | 0.988 | 0.041 | 436.44  | 0.968 | P-T |       | $K^o, H_t$                                                      | 2                                   |   |
|        |     |       |       |         | T-A   | Yes | f, g1 | $P_a$                                                           | 1                                   |   |
|        | 475 | 0.867 |       |         | G-R   |     | b1    | $C_a, pH_i, M_v, M_w,$<br>$H_{nc}, V^0, \mu, E_{sm}, E_t$       | 9                                   |   |
|        | 483 | 0.909 |       |         | Q-P   |     | b1    | $P_c, K^o, \alpha_M, H_t$                                       | 3                                   |   |
| AVP    | 159 |       |       | 1111.96 | 0.852 | A-S |       | $P_a, P_c, P$                                                   | 3                                   |   |
|        | 162 |       |       | 1271.98 | 0.885 | G-P |       | $B_b, \alpha_c, H_t$                                            | 3                                   |   |

<sup>a</sup> Codons identified by PAML as under positive selection along with Bayesian (BEB) analysis PPs for sites with P>80% under M8 and branch-site models.

<sup>b</sup> Codons were estimated in DATAMONKEY.

<sup>c</sup> Amino acid substitution occurred along clades, with detailed information marked in Figure 1.

<sup>d</sup> Radical changes in amino acid properties under category 6-8 were detected in TreeSAAP. Physicochemical amino acid properties available in TreeSAAP are as following:  $\alpha_c$ : Power to be - C-term.,  $\alpha$ -helix;  $\alpha_n$ : Power to be in the N-terminal of an  $\alpha$ -helix;  $B_r$ : Buriedness;  $C_a$ : Helical contact energy;  $E_l$ : Long-range non-bonded energy;  $E_{sm}$ : Short and medium range non-bonded energy;  $E_t$ : Total non-bonding Energy;  $F$ : Mean r.m.s. fluctuation displacement;  $h$ :Hydropathy;  $H_{nc}$ : Normal consensus hydrophobicity;  $H_p$ : Surrounding hydrophobicity;  $H_t$ : Thermodynamic transfer hydrophobicity;  $K^o$ : Compressibility;  $\mu$ : Refractive index;  $M_v$ : Molecular volume;  $M_w$ : Molecular weight;  $N_s$ : Average number of surrounding residues;  $P_\alpha$ :  $\alpha$ - helical tendencies;  $P_\beta$ :  $\beta$ -structure tendencies;  $P_c$ : Coil tendencies;  $P$ : Turn tendencies;  $p$ : Polarity;  $pH_i$ : Isoelectric point;  $pK'$ : Equilibrium Constant of ionization for COOH;  $P_r$ : Polar requirement;  $R_a$ : Solvent accessible reduction ratio;  $R_F$ : Chromatographic index;  $V^0$ : Partial specific volume;

Table S9 Habitat information of species habitually exposed to hypoxia environment in this study

| Species                        | Genus         | Family   | Order        | Habitat information                                                                                                  | Reference                |
|--------------------------------|---------------|----------|--------------|----------------------------------------------------------------------------------------------------------------------|--------------------------|
| <i>Bos grunniens</i>           | Bos           | Bovidae  | Artiodactyla | High-altitude environments of Tibetan Plateau, a low partial pressure of oxygen and high ultraviolet radiation       | Qiu et al. 2012          |
| <i>Bos mutus</i>               | Bos           | Bovidae  | Artiodactyla | High-altitude environments of Tibetan Plateau, a low partial pressure of oxygen and high ultraviolet radiation       | Leslie and Schaller 2009 |
| <i>Pantholops hodgsonii</i>    | Pantholops    | Bovidae  | Artiodactyla | High-altitude environments of Tibetan Plateau, a low partial pressure of oxygen and high ultraviolet radiation       | Ge et al. 2013           |
| <i>Leptonychotes weddellii</i> | Leptonychotes | Phocidae | Carnivora    | Marine mammals, substantial parts of their lives moving within the water, aquatic foraging, performing extreme dives | Stewart 2009             |
| <i>Mirounga angustirostris</i> | Mirounga      | Phocidae | Carnivora    | Marine mammals, substantial parts of their lives moving within the water, aquatic foraging, performing extreme dives | Stewart 2009             |
| <i>Phoca groenlandica</i>      | Phoca         | Phocidae | Carnivora    | Marine mammals, substantial parts of their lives moving within the water, aquatic foraging, performing extreme dives | Stewart 2009             |
| <i>Pusa hispida</i>            | Pusa          | Phocidae | Carnivora    | Marine mammals, substantial parts of their lives moving within the water, aquatic foraging, performing extreme dives | Stewart 2009             |
| <i>Cystophora cristata</i>     | Cystophora    | Phocidae | Carnivora    | Marine mammals, substantial parts of their lives moving within the water, aquatic foraging, performing extreme dives | Stewart 2009             |

|                                       |                |              |             |                                                                                                                      |                                |
|---------------------------------------|----------------|--------------|-------------|----------------------------------------------------------------------------------------------------------------------|--------------------------------|
| <i>Erignathus barbatus</i>            | Erignathus     | Phocidae     | Carnivora   | Marine mammals, substantial parts of their lives moving within the water, aquatic foraging, performing extreme dives | Stewart 2009                   |
| <i>Callorhinus ursinus</i>            | Callorhinus    | Otariidae;   | Carnivora   | Marine mammals, substantial parts of their lives moving within the water, aquatic foraging, performing extreme dives | Stewart 2009                   |
| <i>Odobenus rosmarus divergens</i>    | Odobenus       | Odobenidae   | Carnivora   | Marine mammals, substantial parts of their lives moving within the water, aquatic foraging, performing extreme dives | Stewart 2009                   |
| <i>Condylura cristata</i>             | Condylura      | Soricomorpha | Insectivora | Semi-aquatic habit, adept burrower and excellent swimmer                                                             | Hamilton 1931;<br>Hickman 1984 |
| <i>Spalax judaei</i>                  | Nannospalax    | Spalacidae   | Rodentia    | Subterranean, entire life in underground burrows, extremely hypoxic environments                                     | Fang et al. 2014               |
| <i>Spalax carmeli</i>                 | Nannospalax    | Spalacidae   | Rodentia    | Subterranean, entire life in underground burrows, extremely hypoxic environments                                     | Fang et al. 2014               |
| <i>Spalax golani</i>                  | Nannospalax    | Spalacidae   | Rodentia    | Subterranean, entire life in underground burrows, extremely hypoxic environments                                     | Fang et al. 2014               |
| <i>Heterocephalus glaber</i>          | Heterocephalus | Bathyergidae | Rodentia    | Inhabit subterranean burrows in extremely hard soils, colony                                                         | Sherman et al 2002             |
| <i>Ochotona curzoniae</i>             | Ochotona       | Ochotonidae  | Lagomorpha  | High-altitude environments of Tibetan Plateau, a low partial pressure of oxygen and high ultraviolet radiation       | Smith and Foggin. 1999         |
| <i>Trichechus manatus latirostris</i> | Trichechus     | Trichechidae | Sirenia     | Marine mammals, aquatic herbivore, diving                                                                            | Stewart 2009                   |

Table S10 Convergent/parallel amino acid changes detected in hypoxia-exposed species

| <b>Gene</b> | <b>Parallel Substitution</b> | <b>Branch Pair</b>                                   | <b>Observed Number</b> | <b>Expected Number</b> | <b>P value</b> |
|-------------|------------------------------|------------------------------------------------------|------------------------|------------------------|----------------|
| ADRA1D      | P50A<br>A53G                 | <i>Heterocephalus glaber</i> .VS. ancestor of whales | 2                      | 0                      | 0              |
| AVPR1B      | I/V270T                      | <i>Heterocephalus glaber</i> .VS. ancestor of whales | 1                      | 0                      | 0              |

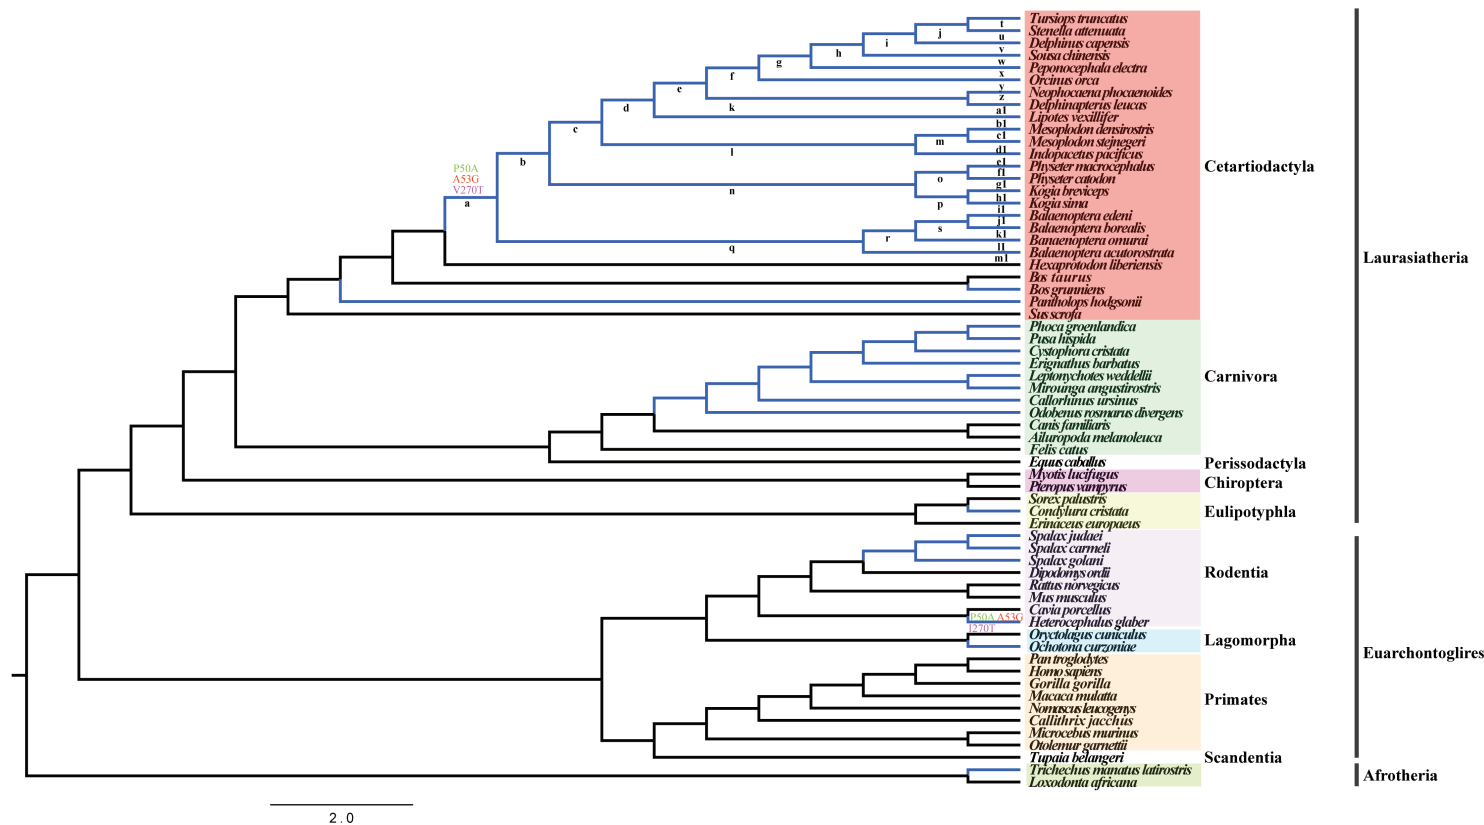

Figure. S1 The tree topology used to conduct the selective pressure analysis in PAML. This tree is based on OrthoMaM (Ranwez et al. 2007). Different orders of mammals were marked with different colors. Blue color branches in the tree represented cetaceans (branch: a-m1) (fig. 1) and other hypoxia species. They are used in the branch-site models tests, and results listed in table 2 and fig. 1. Convergent/parallel amino acid changes were identified the blue lineages leading to hypoxia-exposed animals. The symbols above the branches are the amino acid replacements (ADRA1D: P50A, A53G, AVPR1B: I/V270T).



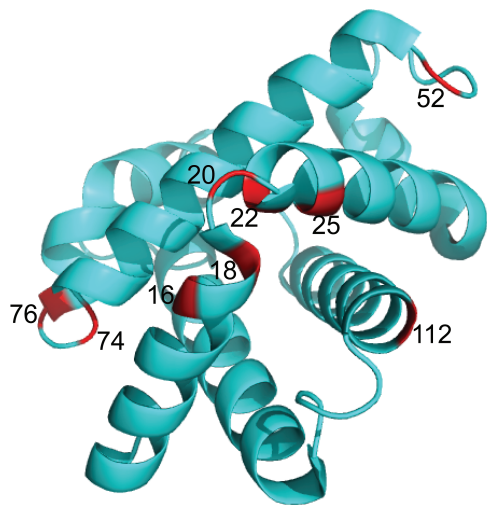

HBA

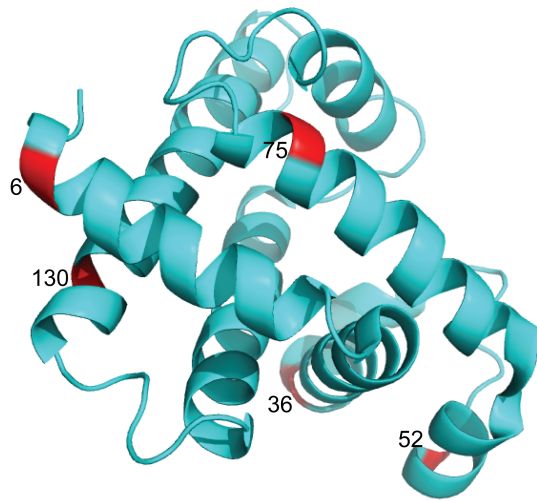

MB

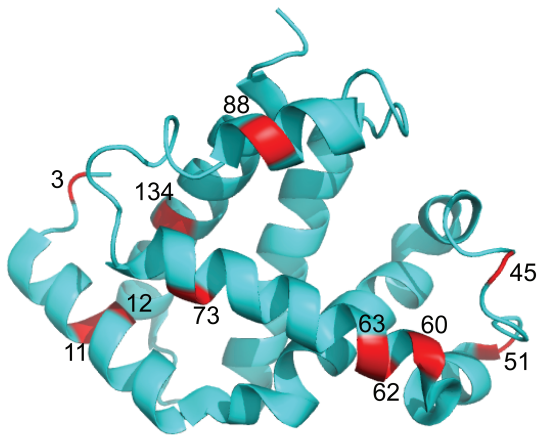

HBB

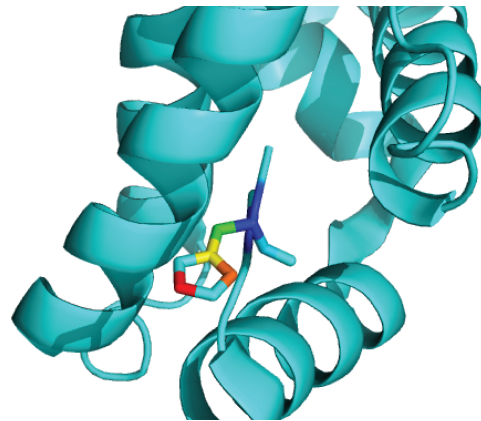

HBB residue 3

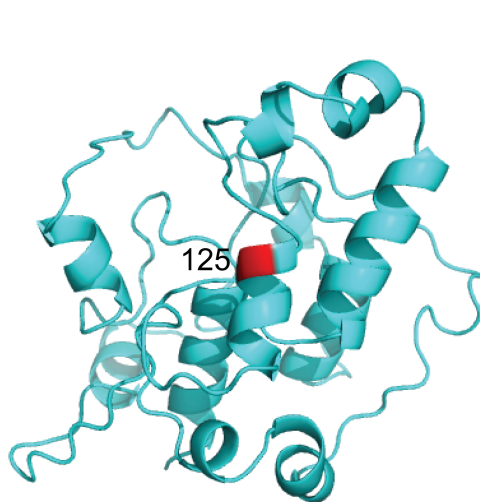

EDN1

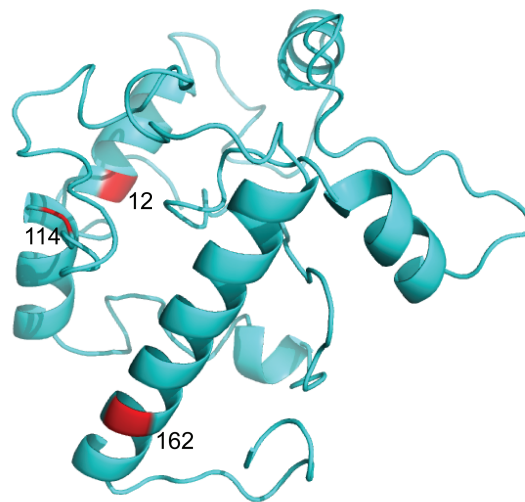

EDN2

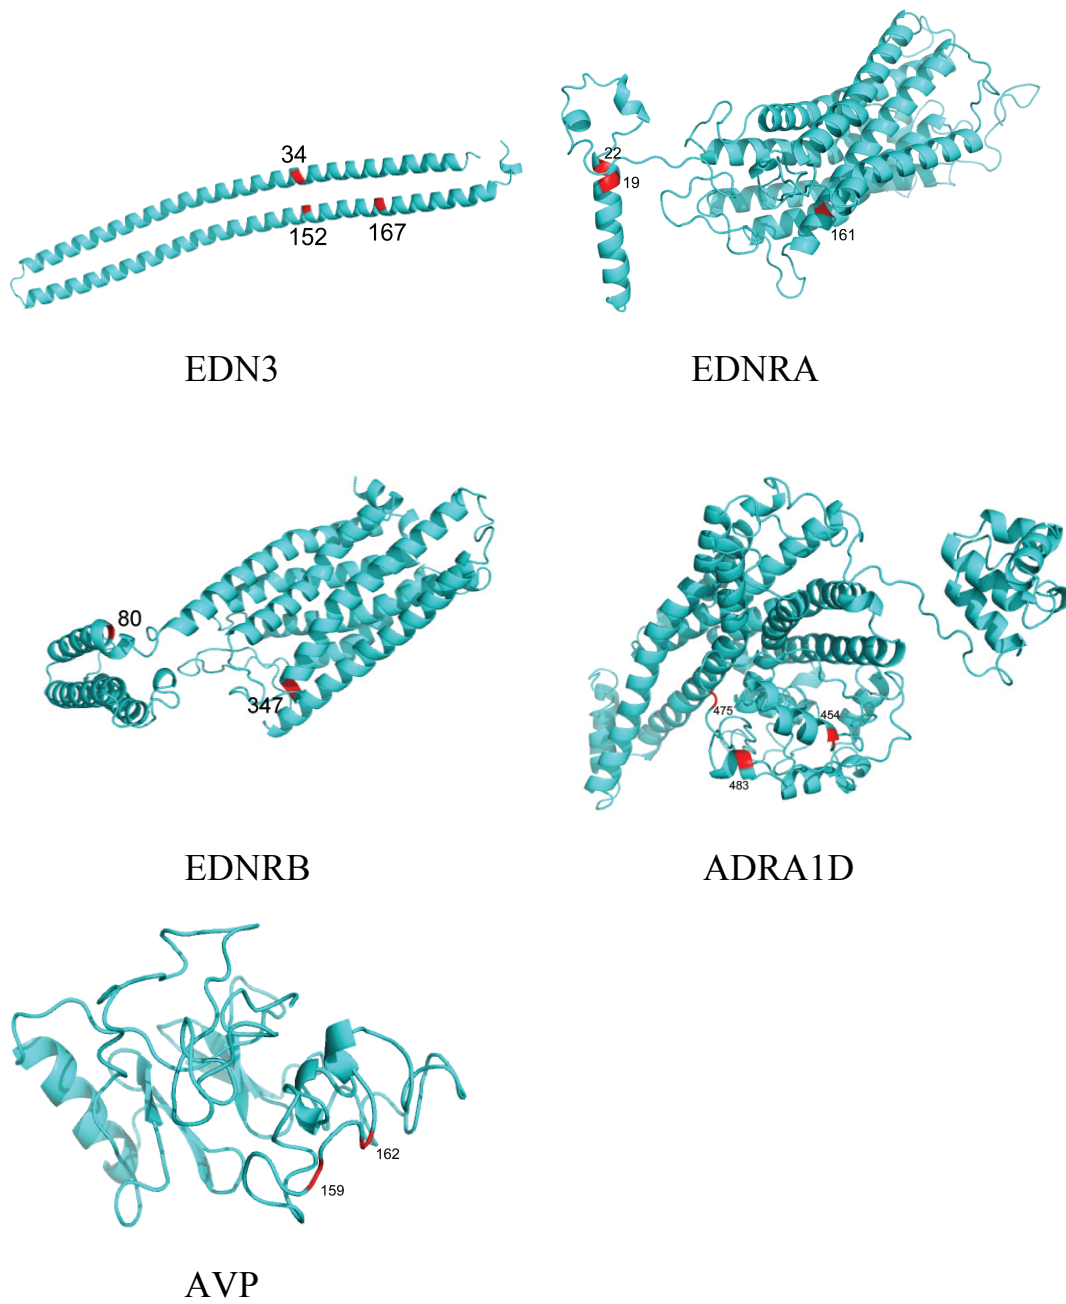

Figure S2 Distribution of mutations in the three-dimensional structure of HBA, HBB, MB, EDN1, EDN2, EDN3, EDNRA, EDNRB, ADRA1D, and AVP genes for cetacean. The figures were created using PyMOL (<http://www.pymol.org>).

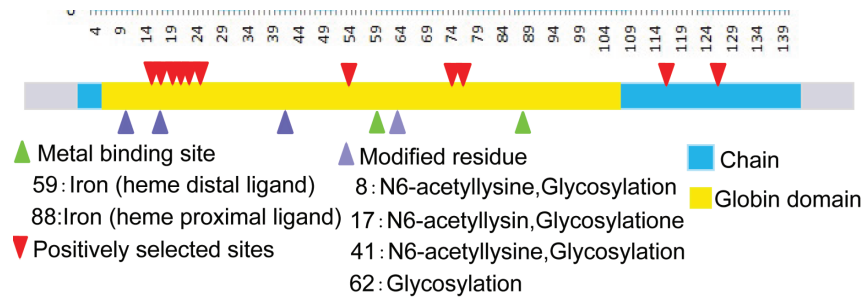

A: HBA

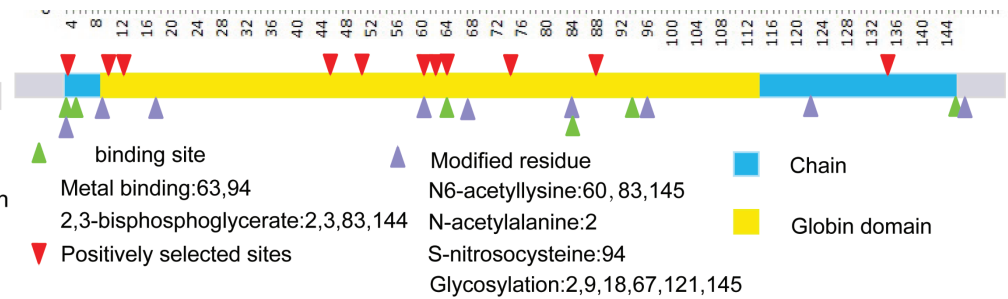

B: HBB

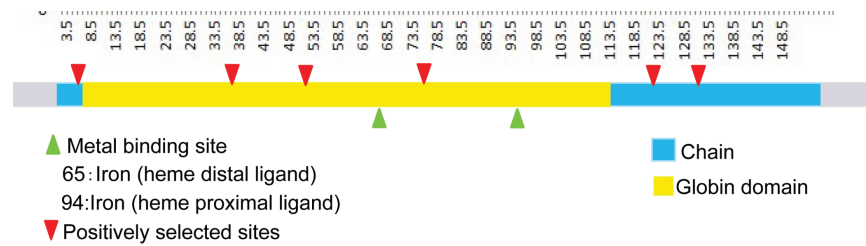

C: MB

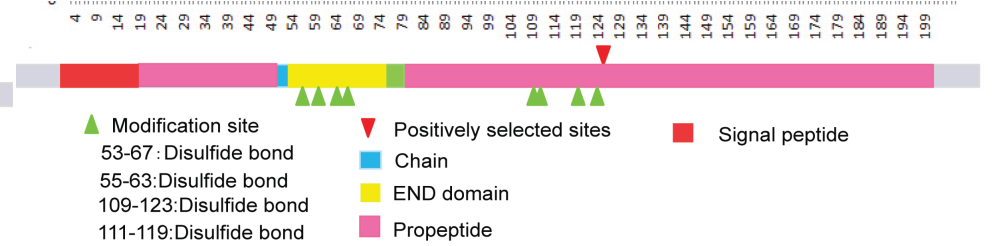

D: EDN1

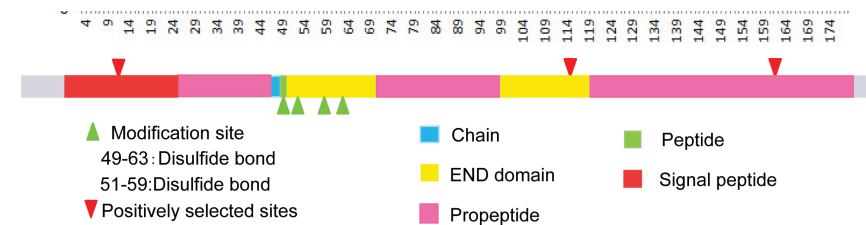

E: EDN2

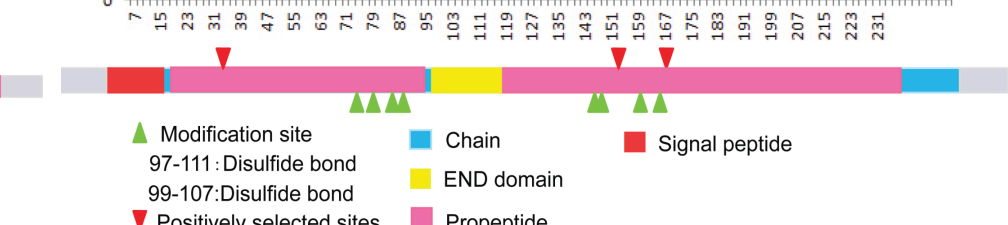

F: EDN3

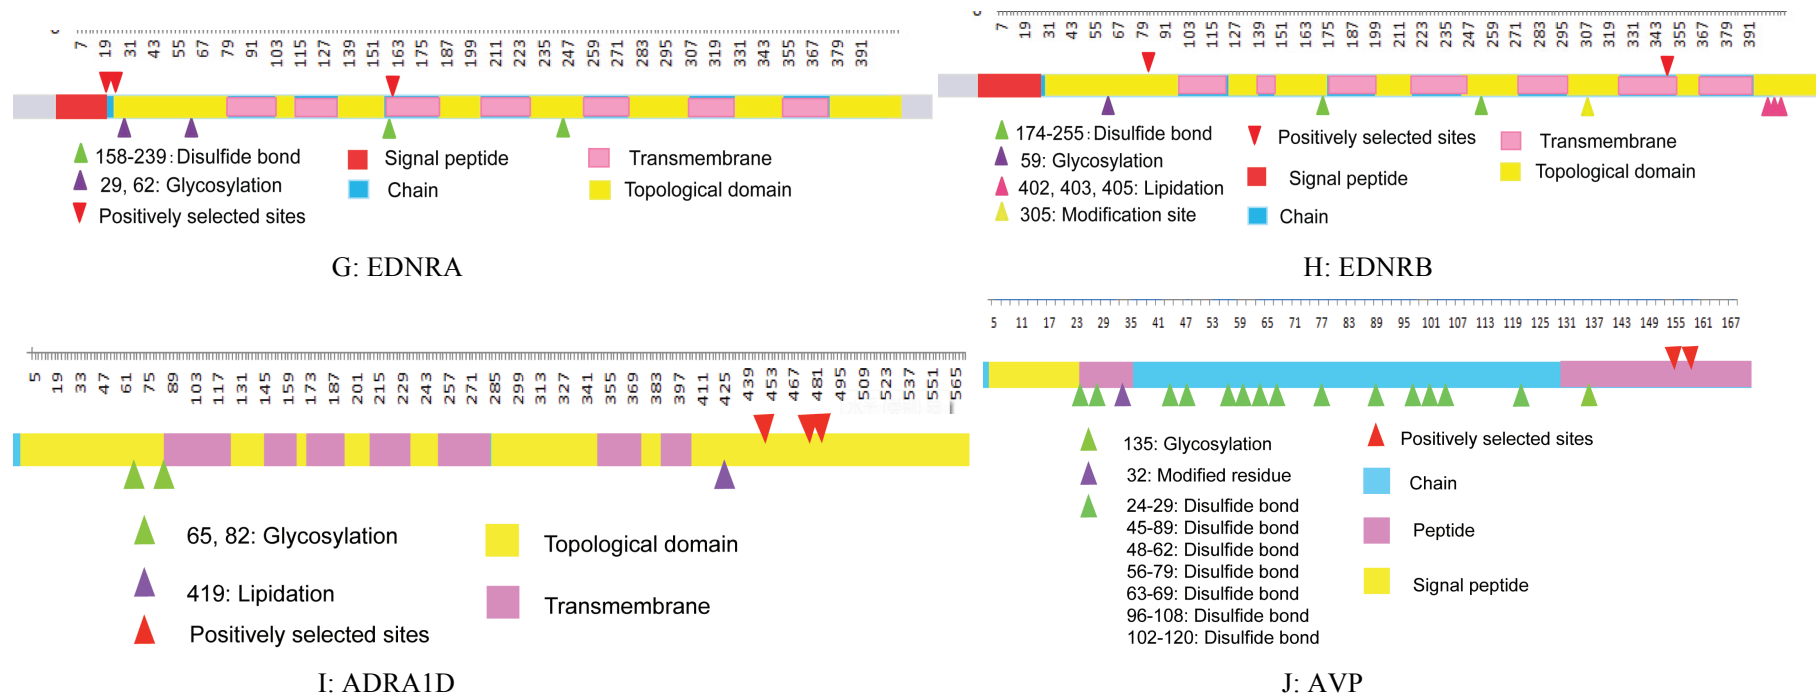

Figure S3 Secondary structure and distribution of positively selected sites in relation to the functionally important regions for gene HBA, HBB, MB, EDN1, EDN2, EDN3, EDNRA, EDNRB, ADRA1D, and AVP.

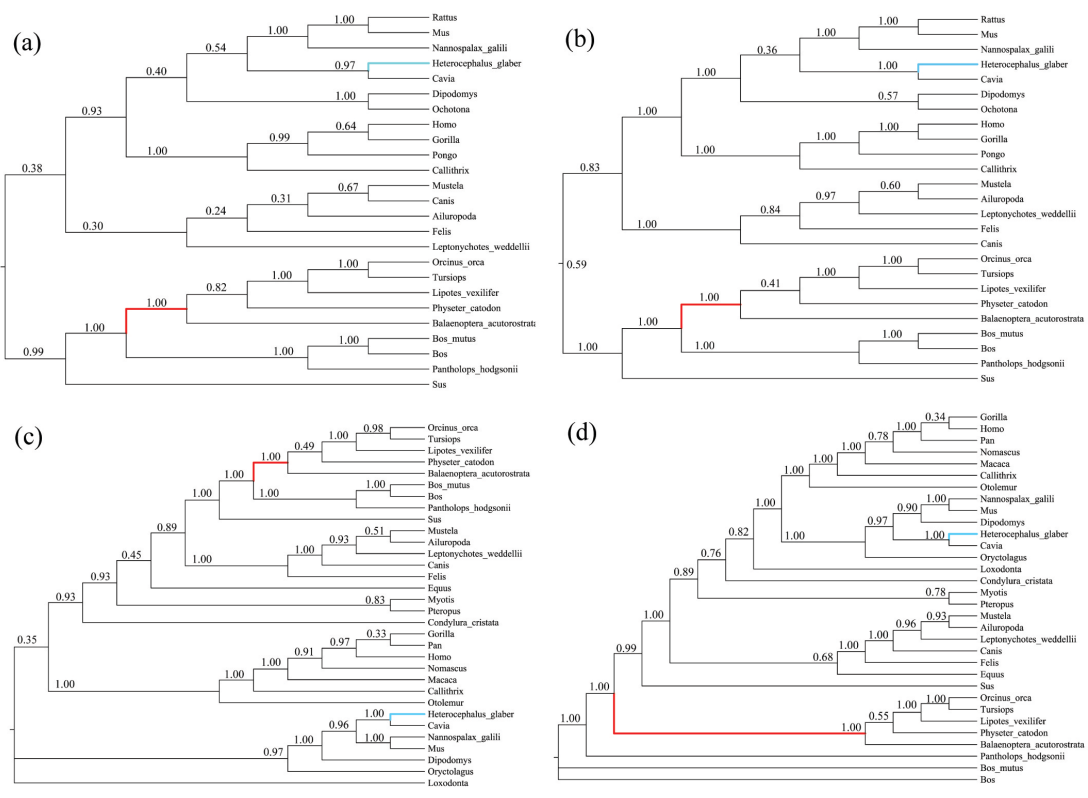

Figure S4 The phylogenetic topology of the ADRA1D and AVPR1B gene based on nucleotide sequences and amino acid sequences. Numbers above the branches are the Bayesian posterior probabilities. (a) amino acid tree of ADRA1D; (b) nucleotide tree of ADRA1D; (c) amino acid tree of AVPR1B; (d) nucleotide tree of AVPR1B. Red and blue branches indicate the lineage along the ancestor of cetaceans and the naked mole rat, respectively.

|                                          |             |                     |                        |                    |                 |              |            |           |
|------------------------------------------|-------------|---------------------|------------------------|--------------------|-----------------|--------------|------------|-----------|
| <i>Homo sapiens</i>                      | MVHLTPEEKS  | AVTALWGKVN          | VDEVGGEALG             | RLLVVYPWTQ         | RFESFGDLS       | TPDAVMGNPK   | VKAHGKKVLG | AFSDGLAHL |
| <i>Physeter macrocephalus</i>            | ..Q..A...   | GL...A...           | .E.I.....              | .....H....         | SA...K...Q..... | A S.GE..K... |            |           |
| <b>LCA of the <i>P.macrocephalus</i></b> | .....A..... | .....A.....         | .E.I.....              | .....H....         | .A...K..N.....  | A S..E..K... |            |           |
| <i>Tursiops truncatus</i>                | .....G..... | .....E.....         | .....A...K..N..K..Q..  | A S.GE..K...       |                 |              |            |           |
| <i>Delphinus capensis</i>                | .....G..... | .....E.....         | .....A...K..N..K..Q..  | A S.GE..K...       |                 |              |            |           |
| <i>Sousa chinensis</i>                   | .....G..... | .....E.....         | .....A...K..N..K.....  | A S.GE..K...       |                 |              |            |           |
| <i>Orcinus orca</i>                      | .....G..... | .....E.....         | .....A...K..N..K.....  | A S.GE..K...       |                 |              |            |           |
| <i>Delphinapterus leucas</i>             | .....G..... | .....A.....E.....   | .....A...K..N..K..Q..  | A S..E..K...       |                 |              |            |           |
| <i>Neophocaena phocaenoides</i>          | .....G..... | .....E.....         | .....A...K..N..K.....  | A S.GE..K...       |                 |              |            |           |
| <i>Lipotes vexillifer</i>                | .....G..... | .....E.....         | .....A...K..AN..K..... | A S..E..K...       |                 |              |            |           |
| <i>Mesoplodon densirostris</i>           | .....G..... | .....A...A...E..... | .....A...K..N..K.....  | S.....K...         |                 |              |            |           |
| <i>Kogia sima</i>                        | .....A..... | .....A...E.I.....   | .....H....             | .A...K..AS..S..... | A S..E..K.F.    |              |            |           |
| <i>Balaenoptera omurai</i>               | .....A..... | .....A...E.....     | .....A...K.....        | A S.....K...       |                 |              |            |           |
| <i>Balaenoptera acutorostrata</i>        | .....A..... | .....A...E.....     | .....A...K.....        | A S.....K...       |                 |              |            |           |

|                                          |             |               |               |             |            |            |         |
|------------------------------------------|-------------|---------------|---------------|-------------|------------|------------|---------|
| <i>Homo sapiens</i>                      | NLKGTFATLS  | ELHCDKLHVD    | PENFRLLGNV    | LVCVLAHHFG  | KEFTPPVQAA | YQKVVAGVAN | ALAHKYH |
| <i>Physeter macrocephalus</i>            | .....       | .....         | .....V...R... | .....EL.T.  | .....      | .....      | .....   |
| <b>LCA of the <i>P.macrocephalus</i></b> | .....       | .....         | .....V...R... | .....EL.T.  | .....      | .....      | .....   |
| <i>Tursiops truncatus</i>                | D.....A...  | .....V...R... | .....EL.S.    | .....T..... | .....      | .....      | .....   |
| <i>Delphinus capensis</i>                | D.....A...  | .....V...R... | .....EL.S.    | .....T..... | .....      | .....      | .....   |
| <i>Sousa chinensis</i>                   | D.....A...  | .....V...R... | .....E..S.    | .....T..... | .....      | .....      | .....   |
| <i>Orcinus orca</i>                      | D.....A...  | .....V...R... | .....EL.S.    | .....T..... | .....      | .....      | .....   |
| <i>Delphinapterus leucas</i>             | D.....A...  | .....V...R... | .....EL.S.    | .....T..... | .....      | .....      | .....   |
| <i>Neophocaena phocaenoides</i>          | D.....A...  | .....V...R... | .....EL.S.    | .....T..... | .....      | .....      | .....   |
| <i>Lipotes vexillifer</i>                | D.....A...  | .....V...R... | .....EL.S.    | .....T..... | .....      | .....      | .....   |
| <i>Mesoplodon densirostris</i>           | D.....A...  | .....V.....   | .....EL.....  | .....       | .....      | .....      | .....   |
| <i>Kogia sima</i>                        | .....Q..... | .....V...R... | .....EL.T.    | F..L.....   | .....      | .....      | .....   |
| <i>Balaenoptera omurai</i>               | .....       | .....I...R... | .....EL.....  | .....       | .....      | .....      | .....   |
| <i>Balaenoptera acutorostrata</i>        | D.....      | .....I...R... | .....EL.....  | .....       | .....      | .....      | .....   |

Figure S5. An alignment of HBB gene in cetaceans. The sequence of human on the top, and amino acids identical to human HBB are indicated by dots. The important site 3 discussed in the text was shaded by yellow. The alignment of sperm whale (*Physeter macrocephalus*) and its last common ancestor (LCA) show the species-specific amino acid change (H3Q).

## References:

- Akamatsu T, et al. 2002. Diving behaviour of freshwater finless porpoises (*Neophocaena phocaenoides*) in an oxbow of the Yangtze River, China. ICES J Mar Sci. 59:438–443.
- Baird RW, Hanson MB, Dill LM. 2005. Factors influencing the diving behaviour of fish-eating killer whales: sex differences and diel and interannual variation in diving rates. Can J Zool. 83:257–267.
- Breese D, Tershy BR. 1993. Relative abundance of Cetacea in the Canal de Ballenas, Gulf of California. Mar Mammal Sci. 9:319–324.
- Croll DA, Acevedo-Gutiérrez A, Tershy BR, Urbán-Ramírez J. 2001. The diving behavior of blue and fin whales: is dive duration shorter than expected based on oxygen stores? Comp Biochem Physiol A Mol Integr Physiol. 129:797–809.
- Evans WE. 1971. Orientation behavior of delphinids: radio telemetric studies. Ann N Y Acad Sci. 188:142–160.
- Fang X, et al. 2014. Genome-wide adaptive complexes to underground stresses in blind mole rats Spalax. Nat Commun. 5:3966–3966.
- Ge RL, et al. 2013. Draft genome sequence of the Tibetan antelope. Nat Commun. 4:54–56.
- Hickman GC. 1984. Swimming ability of talpid moles, with particular reference to the semi-aquatic *Condylura cristata*. Mammalia. 48:505–513.
- Hamilton WJ. 1931. Habits of the star-nosed mole, *Condylura cristata*. J Mammal. 4:345–355.
- Leslie DM, Schaller GB. 2009. *Bos grunniens* and *Bos mutus* (Artiodactyla: Bovidae). Mammalian Species, 836:1-17.
- Martin AR, Smith TG, Cox OP. 1993. Studying the behaviour and movements of high Arctic belugas with satellite telemetry. Symp Zool Soc Lond. 66: 195–210.
- Parra GJ, Corkeron PJ, Marsh H. 2004. The Indo-Pacific humpback dolphin, *Sousa chinensis* (Osbeck, 1765), in Australian waters: a summary of current knowledge. Aquatic Mammals 30:197–206.
- Qiu Q, et al. 2012. The yak genome and adaptation to life at high altitude. Nat Genet. 44: 946–949.

- Ridgway SH, Harrison RJ. 1986. Diving Dolphins. In: Bryden MM, Harrison RJ, editors. *Research on Dolphins*. Oxford: Clarendon Press. p. 33–58.
- Sherman PW, Jarvis JUM. 2002. Extraordinary life spans of naked mole-rats (*Heterocephalus glaber*). *J Zool*. 258:307–311.
- Smith AT, Foggin JM. 1999. The plateau pika (*Ochotona curzoniae*) is a keystone species for biodiversity on the Tibetan plateau. *Anim Conserv*. 2:235–240.
- Stewart B. 2009. Diving Behavior. In: Perrin WF, Würsig B, Thewissen JGM, editors. *Encyclopedia of Marine Mammals*. San Diego: Academic Press. p. 321–329.
- Tyack PL, Johnson M, Soto NA, Sturlese A, Madsen PT. 2006. Extreme diving of beaked whales. *J Exp Biol*. 209:4238–4253.
- Watkins WA, et al. 1993. Sperm whales tagged with transponders and tracked underwater by sonar. *Mar Mammal Sci*. 9:55–67.
